# Supplementary material for: Clindamycin-Based 3D-Printed and Electrospun Coatings for Treatment of Implant-Related Infections
Source: MDPI journal article supplement (doi:10.3390/ma14061464), 2021-03-17
Supplement: s1 [file s1]

## SUPPLEMENTARY DOCUMENT

# Clindamycin based 3D Printed and Electrospun Coatings for Treatment of Implant-Related Infections

Tina Maver<sup>1,2,\*</sup>, Tinkara Mastnak<sup>3</sup>, Mihela Mihelič<sup>3</sup>, Uroš Maver<sup>1,2</sup> and Matjaž Finšgar<sup>3,\*</sup>

<sup>1</sup> Institute of Biomedical Sciences, Faculty of Medicine, University of Maribor, Taborska ulica 8, SI-2000 Maribor, Slovenia

<sup>2</sup> Department of Pharmacology, Faculty of Medicine, University of Maribor, Taborska ulica 8, SI-2000 Maribor, Slovenia

<sup>3</sup> Faculty of Chemistry and Chemical Engineering, University of Maribor, Smetanova ulica 17, 2000 Maribor, Slovenia

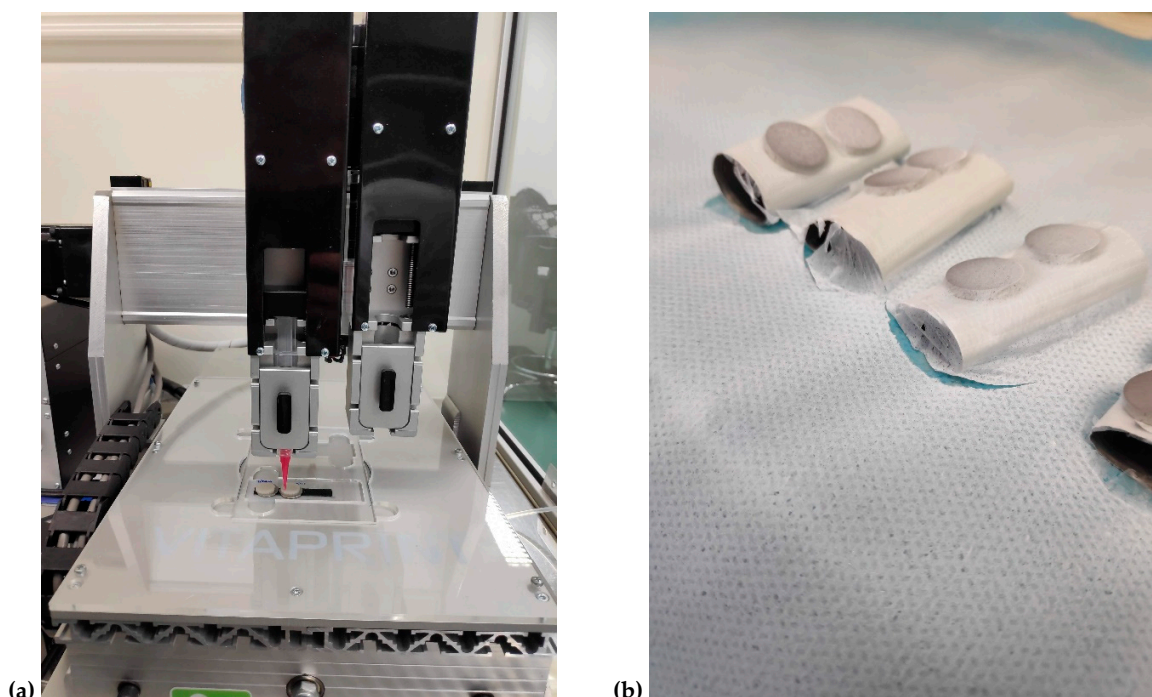

**Figure S1.** Photographs of: (a) 3D printed samples, and (b) electrospun samples. NO differences between the samples are directly observable.

## SUPPLEMENTARY DOCUMENT

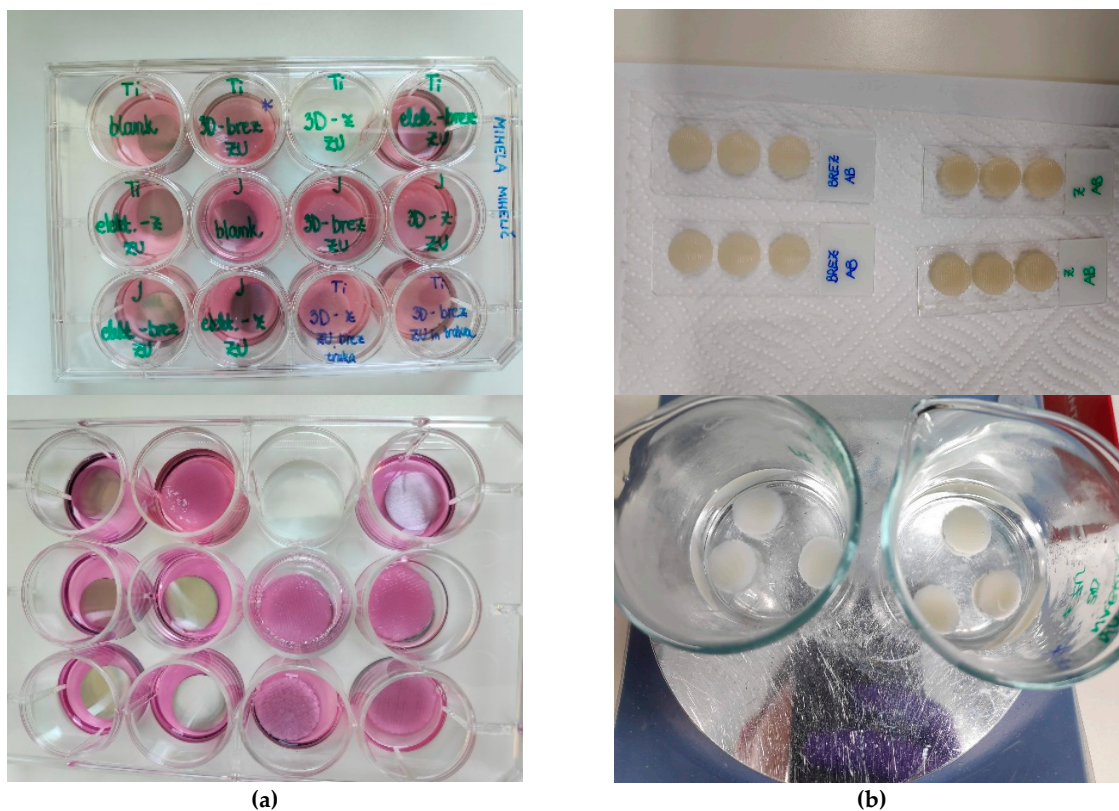

Figure S2. Photographs of experiments: (a) cell testing, and (b) degradation studies.
